# Supplementary material for: Lead Tolerance and Accumulation in Hirschfeldia incana, a Mediterranean Brassicaceae from Metalliferous Mine Spoils
Source: PubMed Central journal article supplement (PMC3646990; doi:10.1371/journal.pone.0061932), 2013-05-07

**A**

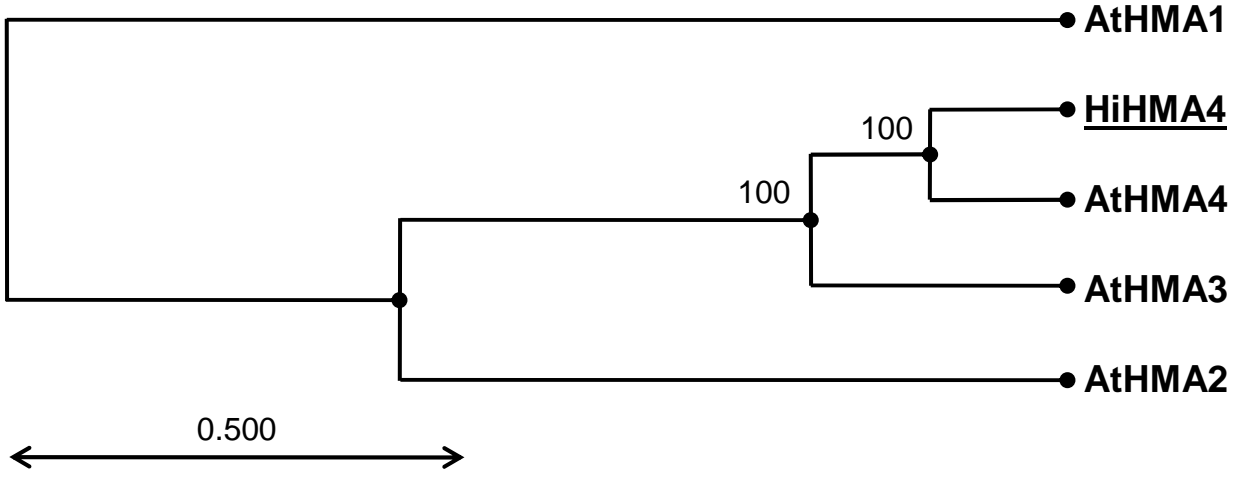

**B**

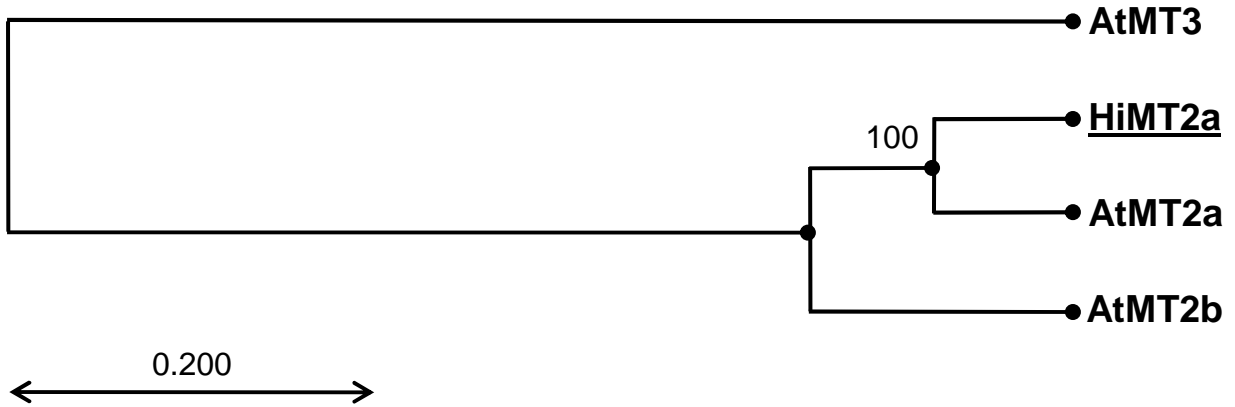

Supplement: pone.0061932.s001.pdf [file pone.0061932.s001.pdf]
